# Supplementary material for: Fault slip potential induced by fluid injection in the Matouying enhanced geothermal system (EGS) field, Tangshan seismic region, North China
Source: Copernicus journal article supplement (doi:10.5194/nhess-22-2257-2022), 2022-07-12
Supplement: Supplementary file 1 [file nhess-22-2257-2022-supplement.pdf]

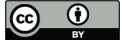

*Supplement of*

**Fault slip potential induced by fluid injection in the  
Matouying enhanced geothermal system (EGS)  
field, Tangshan seismic region, North China**

**Chengjun Feng et al.**

*Correspondence to:* Chengjun Feng ([feng2010618@aliyun.com](mailto:feng2010618@aliyun.com))

The copyright of individual parts of the supplement might differ from the article licence.

1 **Supplement**

2  
3  
4  
5  
6  
7  
8  
9  
10  
11  
12  
13  
14  
15

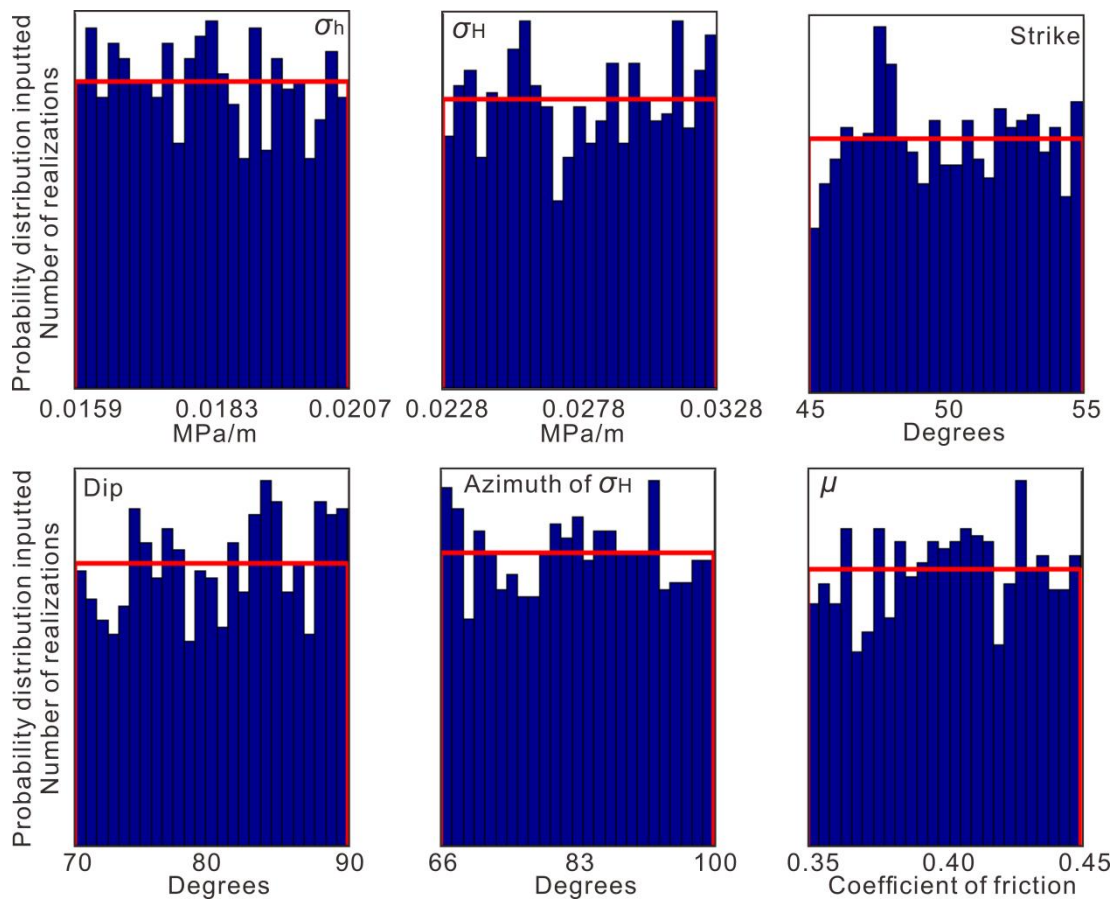

16  
17  
18  
19

**Figure S1.** Probability distributions inputted of the initial in situ stress field and the characteristic parameters of the mapped fault  $F_{4-1}$  of the Tangshan fault belt.  $\sigma_H$  and  $\sigma_h$  denote the maximum and minimum horizontal principal stresses, respectively.

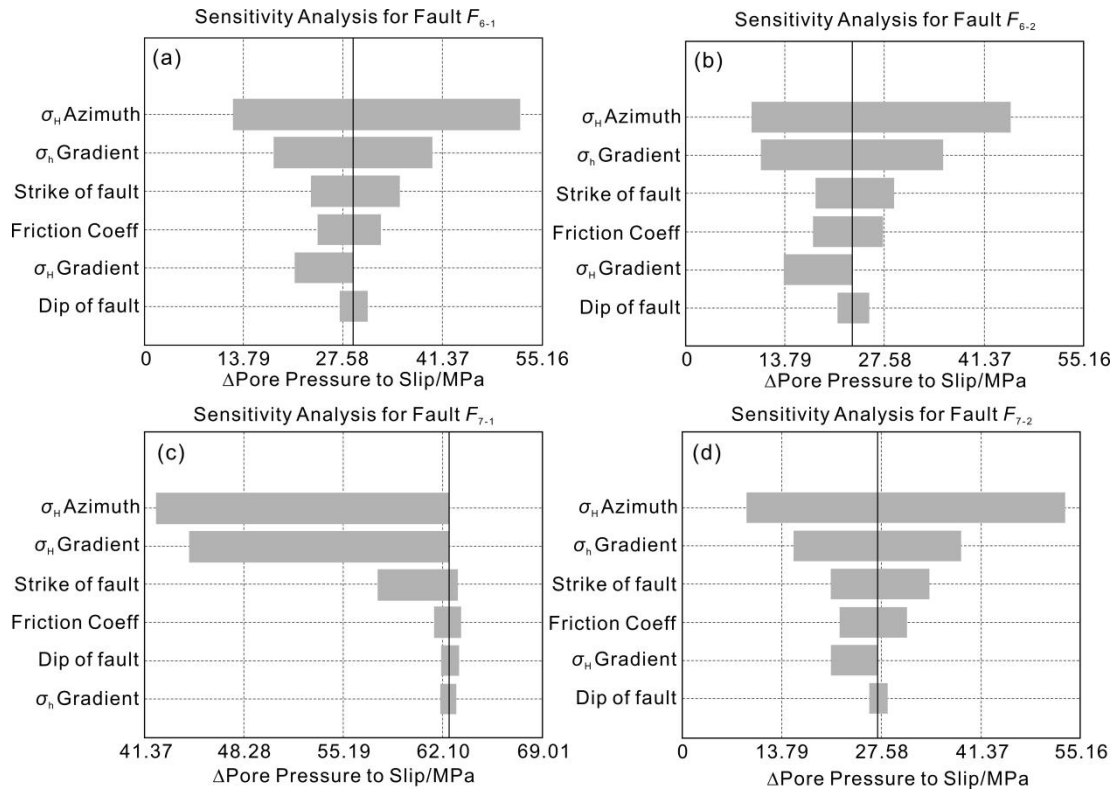

1  
2  
3  
4  
5

**Figure S2.** Sensitivity of the fault slip potential (FSP) on the mapped faults to uncertainties in various input parameters. (a) A case of fault  $F_{6-1}$ , (b) a case of fault  $F_{6-2}$ , (c) a case of fault  $F_{7-1}$ , and (d) a case of fault  $F_{7-2}$ .

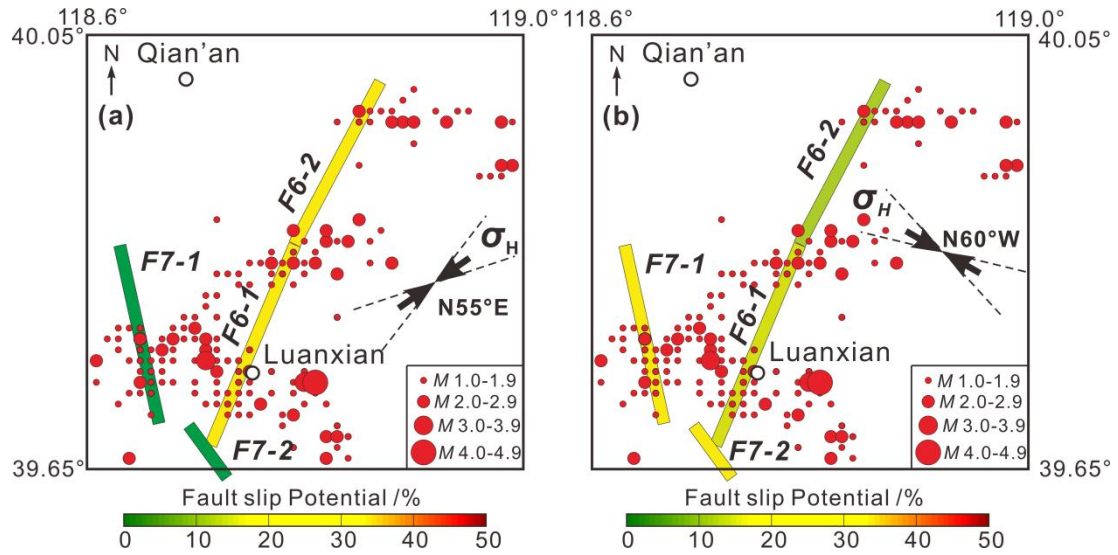

6  
7  
8

**Figure S3.** The probabilistic fault slip potential on the faults  $F_{6-1}$ ,  $F_{6-2}$ ,  $F_{7-1}$ , and  $F_{7-2}$  in Lulong basin and the  $\sigma_H$  azimuth of the hypothetical local stress field. (a) The  $\sigma_H$  is oriented at  $55^\circ \pm 17^\circ$ . (b) The  $\sigma_H$  is oriented at  $120^\circ \pm 17^\circ$ .

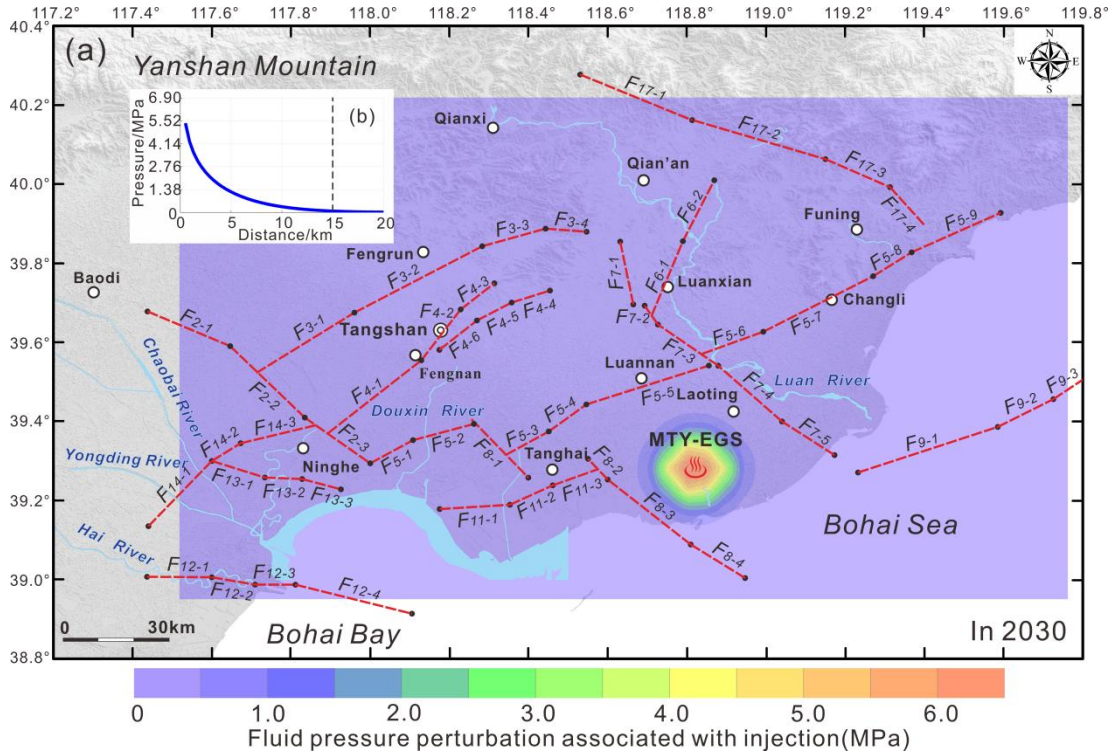

**Figure S4. (a)** Estimated fluid pressure perturbation in 2030 in response to fluid injection at five hypothetical wells in the MTY EGS field. **(b)** Estimated decay of the fluid pressure perturbation with distance in the MTY EGS field in 2030.

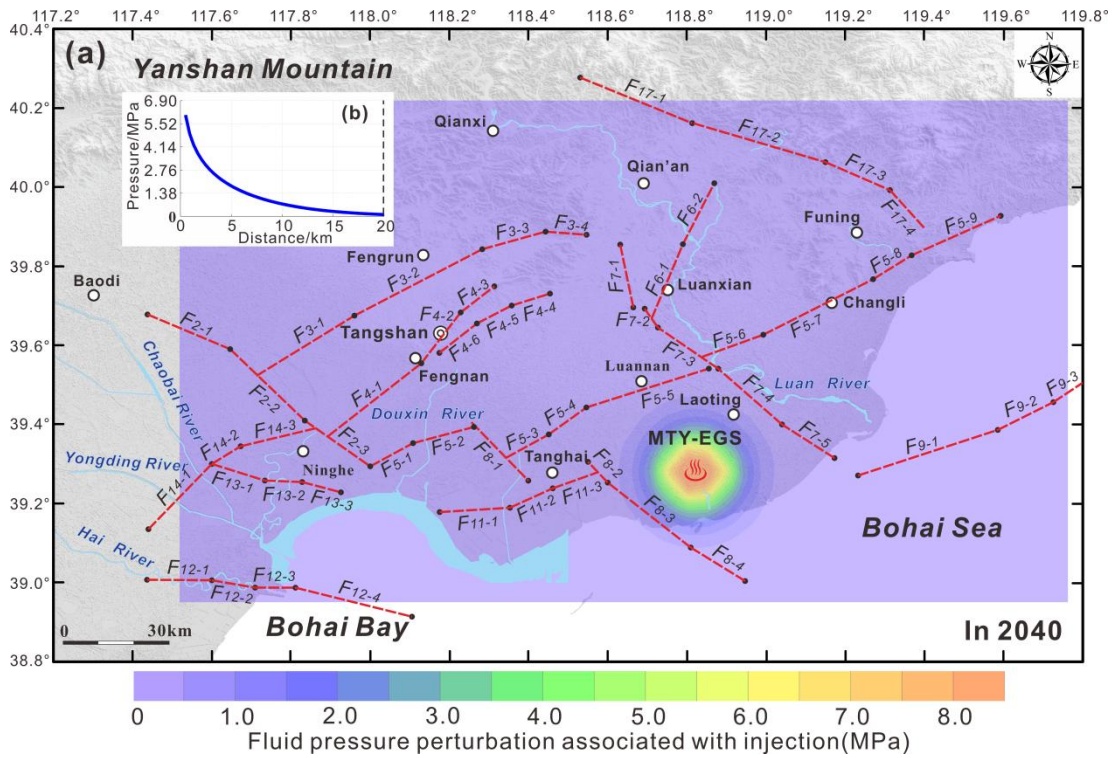

**Figure S5. (a)** Estimated fluid pressure perturbation in 2040 in response to fluid injection at five hypothetical wells in the MTY EGS field. **(b)** Estimated decay of the fluid pressure perturbation with distance in the MTY EGS field in 2040.

1

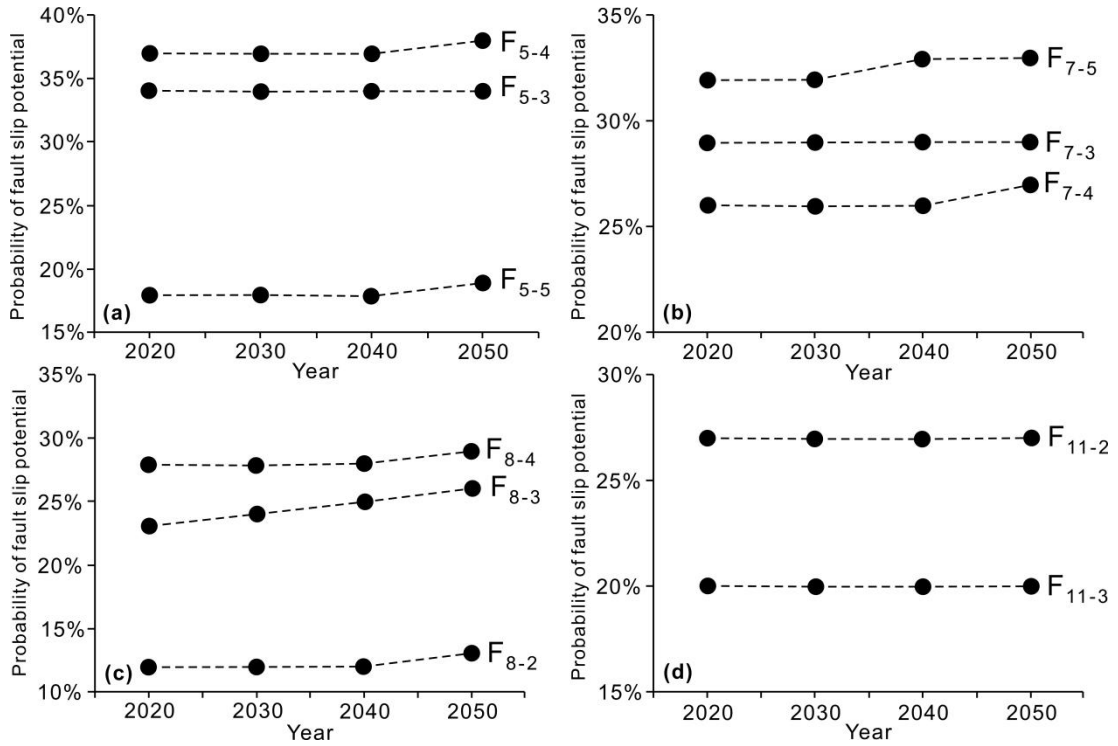

2

3

4

5

6

7

8

9

**Figure S6.** Changes of the probabilistic fault slip potential on the mapped faults within a range of ~30-45 km away from the injected wells in the MTY EGS field from 2020 to 2050. **(a)** The FSP values on the southwestern segment of the Changli-Ninghe fault. **(b)** The FSP values on the southeastern segment of the Luanxian-Laoting fault zone. **(c)** The FSP values on the Baigezhuang fault. **(d)** The FSP values on the Xi'nanzhuang fault.

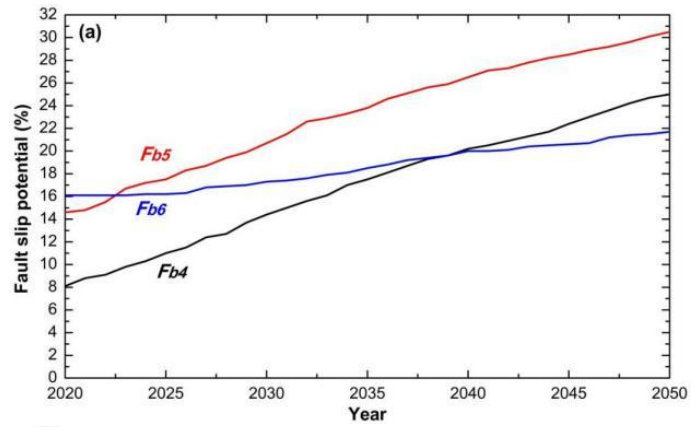

1

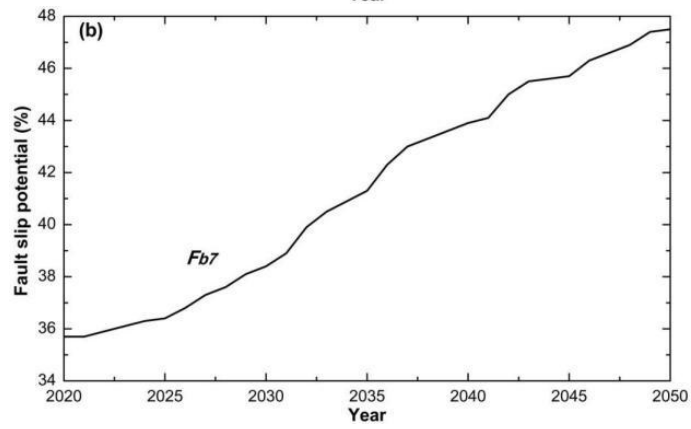

2

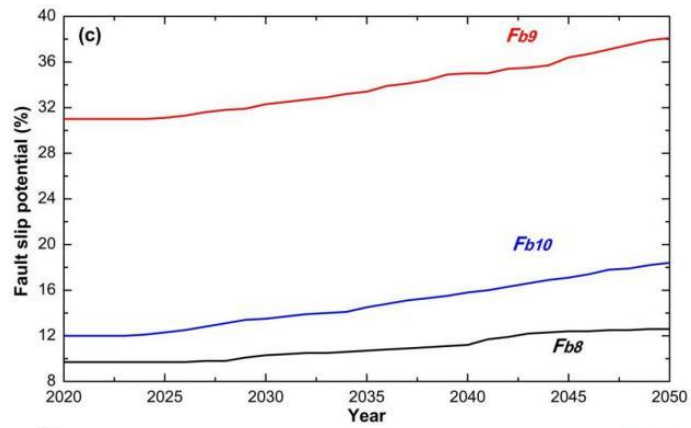

3

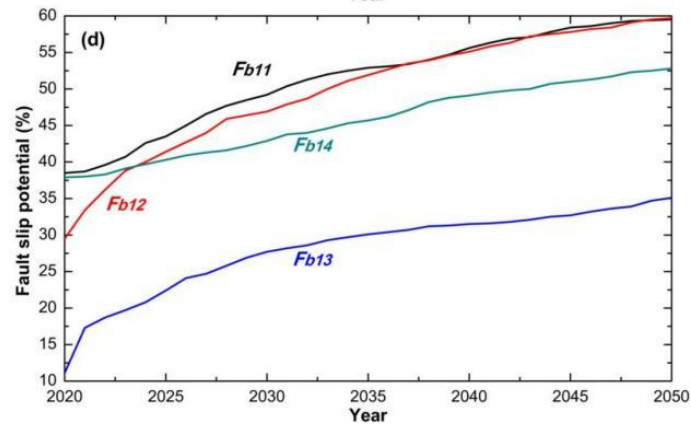

4

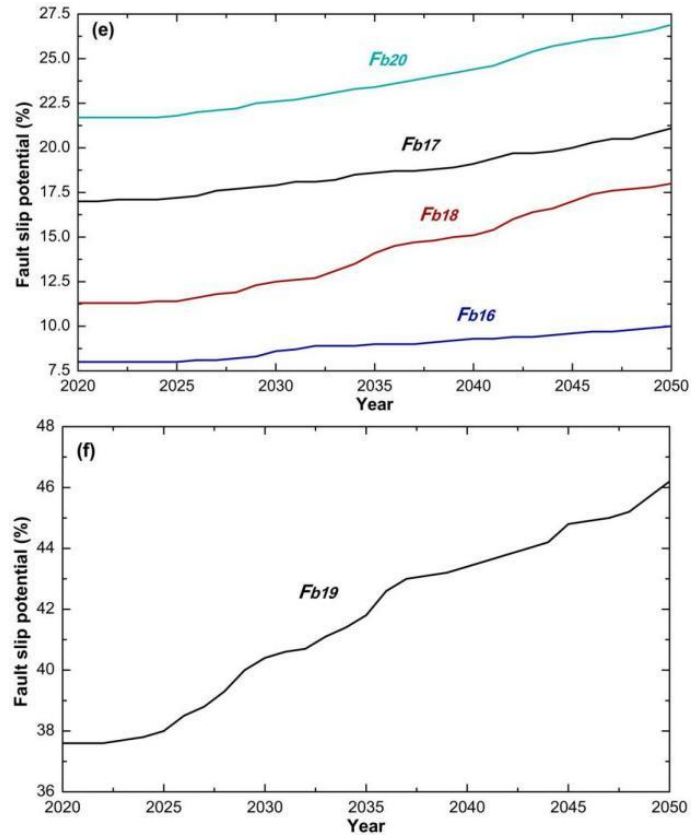

1

2

3

4

**Figure S7.** Changes of the probabilistic fault slip potential on the mapped faults within a range of ~15-20 km away from the injected wells in response to the hypothetical fluid injection in the MTY EGS field from 2020 to 2050.

1

2

**Table S1.** Focal mechanisms of small and moderate earthquakes in Tangshan seismic region, North China.

| Number | Date       | Longitude /(°E) | Latitude /(°E) | Depth /(m) | Magnitude | Strike I /(°) | Dip I /(°) | Rake I /(°) |
|--------|------------|-----------------|----------------|------------|-----------|---------------|------------|-------------|
| 1      | 2006.11.12 | 118.50          | 39.70          | 15         | 3.6       | 96            | 81         | -42         |
| 2      | 2006.12.03 | 118.15          | 39.55          | 10         | 3.0       | 304           | 60         | -6          |
| 3      | 2007.03.05 | 118.00          | 39.38          | 21         | 3.4       | 41            | 40         | 147         |
| 4      | 2007.09.04 | 118.73          | 39.73          | 10         | 3.4       | 112           | 82         | -27         |
| 5      | 2007.11.17 | 119.13          | 39.58          | 19         | 3.5       | 171           | 86         | -175        |
| 6      | 2007.12.27 | 118.08          | 39.50          | 10         | 3.3       | 192           | 42         | -89         |
| 7      | 2008.03.11 | 118.90          | 39.98          | 15         | 4.3       | 105           | 56         | 61          |
| 8      | 2009.10.30 | 117.75          | 39.28          | 10         | 3.2       | 42            | 87         | 164         |
| 9      | 2009.11.22 | 117.78          | 39.45          | 14         | 3.7       | 308           | 66         | -15         |
| 10     | 2010.01.28 | 118.88          | 39.97          | 12         | 2.7       | 215           | 85         | 85          |
| 11     | 2010.02.15 | 118.52          | 39.68          | 11         | 3.3       | 74            | 62         | -49         |
| 12     | 2010.02.17 | 118.68          | 39.77          | 10         | 3.1       | 112           | 67         | 9           |
| 13     | 2010.03.06 | 118.48          | 39.68          | 11         | 3.8       | 302           | 56         | 53          |
| 14     | 2010.03.06 | 118.50          | 39.70          | 10         | 4.8       | 18            | 55         | -84         |
| 15     | 2010.03.06 | 118.65          | 39.73          | 7          | 2.7       | 326           | 56         | 53          |
| 16     | 2010.03.06 | 118.48          | 39.68          | 11         | 2.6       | 215           | 45         | -83         |
| 17     | 2010.03.06 | 118.50          | 39.70          | 10         | 3.6       | 278           | 57         | 33          |
| 18     | 2010.03.06 | 118.50          | 39.68          | 11         | 2.6       | 306           | 44         | 60          |
| 19     | 2010.03.06 | 118.48          | 39.68          | 11         | 3.2       | 300           | 67         | 46          |
| 20     | 2010.03.06 | 118.48          | 39.68          | 11         | 2.8       | 277           | 45         | 5           |
| 21     | 2010.03.07 | 118.52          | 39.68          | 6          | 3.2       | 92            | 71         | -47         |
| 22     | 2010.03.07 | 118.50          | 39.68          | 11         | 2.7       | 241           | 57         | -66         |
| 23     | 2010.03.22 | 118.45          | 39.77          | 11         | 3.0       | 298           | 56         | -72         |
| 24     | 2010.04.09 | 118.07          | 39.47          | 12         | 4.6       | 340           | 87         | -4          |



|    |            |        |       |    |     |     |    |     |
|----|------------|--------|-------|----|-----|-----|----|-----|
| 25 | 2010.04.09 | 118.07 | 39.48 | 12 | 3.1 | 320 | 64 | 79  |
| 26 | 2010.05.02 | 118.47 | 39.12 | 10 | 3.2 | 210 | 10 | -90 |
| 27 | 2010.05.17 | 118.67 | 39.77 | 10 | 2.9 | 297 | 83 | 29  |
| 28 | 2010.06.21 | 118.88 | 39.97 | 4  | 3.1 | 134 | 64 | 16  |
| 29 | 2010.07.12 | 118.08 | 39.52 | 8  | 2.5 | 250 | 70 | 79  |
| 30 | 2010.7.22  | 118.62 | 39.77 | 3  | 2.6 | 341 | 70 | -79 |
| 31 | 2010.08.09 | 118.75 | 39.73 | 5  | 2.6 | 278 | 56 | -78 |
| 32 | 2010.09.05 | 118.62 | 39.75 | 10 | 2.8 | 121 | 85 | -65 |
| 33 | 2010.09.11 | 118.83 | 39.87 | 7  | 2.7 | 127 | 51 | -77 |
| 34 | 2010.09.20 | 118.50 | 39.78 | 3  | 2.6 | 338 | 36 | -31 |
| 35 | 2010.11.30 | 118.37 | 39.73 | 6  | 3.0 | 105 | 40 | -58 |
| 36 | 2010.12.12 | 118.35 | 39.70 | 6  | 3.1 | 321 | 86 | -50 |
| 37 | 2010.12.18 | 118.52 | 39.75 | 6  | 2.5 | 324 | 55 | 45  |
| 38 | 2010.12.28 | 119.33 | 39.55 | 9  | 3.8 | 309 | 64 | 56  |
| 39 | 2011.01.24 | 118.50 | 39.68 | 6  | 3.4 | 307 | 81 | -60 |
| 40 | 2011.02.06 | 117.40 | 39.78 | 7  | 3.5 | 270 | 75 | 0   |
| 41 | 2011.03.07 | 118.75 | 39.73 | 7  | 3.1 | 130 | 89 | -10 |
| 42 | 2011.06.12 | 118.77 | 39.73 | 8  | 2.5 | 115 | 45 | -36 |
| 43 | 2011.06.15 | 118.65 | 39.77 | 6  | 2.7 | 35  | 47 | -69 |
| 44 | 2011.08.19 | 118.88 | 39.98 | 8  | 2.5 | 121 | 40 | -82 |
| 45 | 2011.10.19 | 118.18 | 39.62 | 7  | 2.9 | 292 | 48 | 31  |
| 46 | 2011.10.22 | 118.72 | 39.77 | 6  | 2.7 | 294 | 54 | -59 |
| 47 | 2011.11.23 | 118.87 | 39.98 | 6  | 2.6 | 296 | 76 | -69 |
| 48 | 2011.11.24 | 118.47 | 39.75 | 6  | 2.5 | 25  | 55 | 45  |
| 49 | 2011.11.30 | 118.45 | 39.75 | 7  | 2.5 | 3   | 81 | -70 |
| 50 | 2011.12.01 | 117.37 | 39.82 | 6  | 2.8 | 313 | 45 | 45  |

|    |            |        |       |    |     |     |    |     |
|----|------------|--------|-------|----|-----|-----|----|-----|
| 51 | 2011.12.12 | 118.18 | 39.60 | 6  | 3.7 | 310 | 82 | 6   |
| 52 | 2012.02.15 | 118.65 | 39.77 | 5  | 2.7 | 255 | 55 | -90 |
| 53 | 2012.02.29 | 118.48 | 39.78 | 6  | 2.7 | 305 | 70 | -90 |
| 54 | 2012.04.14 | 118.23 | 39.63 | 6  | 3.3 | 359 | 73 | 10  |
| 55 | 2012.04.21 | 118.37 | 39.73 | 7  | 3.2 | 321 | 82 | 50  |
| 56 | 2012.05.22 | 118.47 | 39.78 | 7  | 2.7 | 324 | 56 | -72 |
| 57 | 2012.05.24 | 118.50 | 39.75 | 6  | 3.1 | 300 | 46 | 54  |
| 58 | 2012.05.28 | 118.47 | 39.72 | 22 | 5.1 | 322 | 90 | 15  |
| 59 | 2012.05.29 | 118.48 | 39.78 | 7  | 3.7 | 157 | 71 | -36 |
| 60 | 2012.06.10 | 117.32 | 39.38 | 9  | 2.8 | 287 | 53 | -43 |
| 61 | 2012.06.18 | 117.57 | 39.62 | 5  | 4.5 | 320 | 84 | 8   |
| 62 | 2012.06.20 | 118.42 | 39.77 | 12 | 2.8 | 132 | 85 | -65 |
| 63 | 2012.08.26 | 117.43 | 39.62 | 9  | 4.0 | 127 | 84 | 8   |
| 64 | 2012.09.24 | 118.52 | 39.78 | 6  | 2.5 | 131 | 80 | -85 |
| 65 | 2012.11.25 | 117.63 | 39.37 | 8  | 2.9 | 84  | 42 | -67 |
| 66 | 2012.12.09 | 118.85 | 39.88 | 7  | 2.8 | 335 | 71 | -7  |
| 67 | 2013.01.08 | 119.22 | 39.68 | 6  | 3.2 | 314 | 76 | -43 |
| 68 | 2013.01.11 | 118.82 | 39.63 | 6  | 3.3 | 320 | 57 | 13  |
| 69 | 2013.02.17 | 118.47 | 39.78 | 7  | 2.9 | 338 | 35 | -42 |
| 70 | 2013.02.25 | 118.17 | 39.57 | 6  | 2.8 | 268 | 56 | -78 |
| 71 | 2013.05.01 | 118.50 | 39.77 | 7  | 2.7 | 1   | 47 | 69  |
| 72 | 2013.05.03 | 117.93 | 39.33 | 8  | 2.9 | 325 | 85 | 0   |
| 73 | 2013.06.03 | 118.50 | 39.80 | 6  | 3.1 | 330 | 51 | 8   |
| 74 | 2013.06.08 | 118.48 | 39.77 | 8  | 2.5 | 317 | 57 | -40 |
| 75 | 2013.06.23 | 118.38 | 39.72 | 6  | 2.8 | 136 | 48 | -31 |
| 76 | 2013.08.03 | 118.68 | 39.78 | 6  | 2.8 | 116 | 80 | -85 |

|    |            |        |       |    |     |     |    |      |
|----|------------|--------|-------|----|-----|-----|----|------|
| 77 | 2013.08.21 | 118.48 | 39.97 | 8  | 2.6 | 83  | 63 | -62  |
| 78 | 2013.08.23 | 118.50 | 39.93 | 9  | 2.6 | 255 | 29 | -58  |
| 79 | 2013.08.23 | 118.50 | 39.93 | 7  | 3.2 | 358 | 31 | -71  |
| 80 | 2014.01.14 | 118.43 | 39.75 | 7  | 3.4 | 154 | 71 | 24   |
| 81 | 2014.01.25 | 118.50 | 39.80 | 6  | 3.0 | 125 | 52 | -27  |
| 82 | 2014.02.11 | 118.78 | 39.87 | 8  | 2.8 | 253 | 36 | -54  |
| 83 | 2014.05.10 | 118.48 | 39.78 | 6  | 2.5 | 95  | 66 | -33  |
| 84 | 2015.01.11 | 118.77 | 39.84 | 11 | 3.3 | 262 | 57 | -140 |
| 85 | 2015.11.15 | 118.56 | 39.75 | 12 | 3.5 | 27  | 70 | 67   |
| 86 | 2015.11.28 | 117.93 | 39.33 | 15 | 4.0 | 60  | 85 | -176 |
| 87 | 2015.12.06 | 117.92 | 39.37 | 23 | 3.4 | 47  | 80 | -155 |
| 88 | 2016.02.12 | 117.95 | 39.37 | 14 | 3.0 | 67  | 62 | -145 |
| 89 | 2016.03.14 | 117.95 | 39.40 | 19 | 3.7 | 204 | 69 | 163  |
| 90 | 2016.05.16 | 118.25 | 39.64 | 22 | 3.5 | 112 | 52 | -37  |
| 91 | 2017.07.04 | 118.84 | 39.31 | 16 | 3.1 | 47  | 86 | -133 |
| 92 | 2017.10.15 | 118.25 | 39.63 | 20 | 3.1 | 240 | 74 | -130 |
| 93 | 2017.10.27 | 118.33 | 39.70 | 17 | 3.4 | 65  | 80 | -160 |
| 94 | 2018.01.06 | 118.48 | 39.67 | 15 | 3.4 | 69  | 57 | -47  |
| 95 | 2018.04.28 | 118.63 | 39.65 | 20 | 3.2 | 282 | 69 | -84  |
| 96 | 2018.08.09 | 119.00 | 39.94 | 10 | 3.5 | 225 | 78 | -173 |
| 97 | 2018.08.10 | 118.49 | 39.79 | 10 | 3.1 | 98  | 74 | 7    |
| 98 | 2019.03.09 | 118.69 | 40.22 | 17 | 3.3 | 7   | 72 | -167 |

1  
2  
3  
4  
5

1 **Table S2.** Results of a deterministic geomechanical assessment of fault pore pressure to slip on the mapped faults in Tangshan seismic region in the present ambient stress field.

| Name of fault                  | Segment   | Length, km | Delta $P_0$ to fault slip, MPa |
|--------------------------------|-----------|------------|--------------------------------|
| Jiyunhe fault ( $F_2$ )        | $F_{2-1}$ | 25.37      | 3.70                           |
|                                | $F_{2-2}$ | 29.37      | 14.99                          |
|                                | $F_{2-3}$ | 22.25      | 7.03                           |
| Yejituo fault ( $F_3$ )        | $F_{3-1}$ | 32.04      | 5.47                           |
|                                | $F_{3-2}$ | 40.50      | 5.44                           |
|                                | $F_{3-3}$ | 18.69      | 6.93                           |
|                                | $F_{3-4}$ | 12.02      | 6.15                           |
| Tangshan fault belt ( $F_4$ )  | $F_{4-1}$ | 33.38      | 2.58                           |
|                                | $F_{4-2}$ | 18.47      | 5.95                           |
|                                | $F_{4-3}$ | 12.02      | 2.85                           |
|                                | $F_{4-4}$ | 11.57      | 16.38                          |
|                                | $F_{4-5}$ | 11.13      | 5.40                           |
|                                | $F_{4-6}$ | 13.80      | 2.58                           |
| Changli-Ninghe fault ( $F_5$ ) | $F_{5-1}$ | 13.80      | 5.82                           |
|                                | $F_{5-2}$ | 17.80      | 13.55                          |
|                                | $F_{5-3}$ | 13.57      | 4.93                           |
|                                | $F_{5-4}$ | 13.13      | 3.25                           |
|                                | $F_{5-5}$ | 36.05      | 12.38                          |
|                                | $F_{5-6}$ | 18.47      | 9.22                           |
|                                | $F_{5-7}$ | 34.71      | 5.82                           |
|                                | $F_{5-8}$ | 12.91      | 4.93                           |
|                                | $F_{5-9}$ | 27.59      | 7.41                           |
| Lulong fault ( $F_6$ )         | $F_{6-1}$ | 22.92      | 24.49                          |
|                                | $F_{6-2}$ | 19.58      | 18.04                          |

|                                  |            |       |       |
|----------------------------------|------------|-------|-------|
| Luanxian-Laoting fault ( $F_7$ ) | $F_{7-1}$  | 18.25 | 62.50 |
|                                  | $F_{7-2}$  | 6.68  | 27.03 |
|                                  | $F_{7-3}$  | 20.69 | 7.03  |
|                                  | $F_{7-4}$  | 24.03 | 10.45 |
|                                  | $F_{7-5}$  | 17.80 | 6.00  |
| Baigezhuang fault ( $F_8$ )      | $F_{8-1}$  | 22.70 | 18.86 |
|                                  | $F_{8-2}$  | 8.46  | 17.80 |
|                                  | $F_{8-3}$  | 29.37 | 10.04 |
|                                  | $F_{8-4}$  | 18.25 | 6.00  |
| Qinbei fault ( $F_9$ )           | $F_{9-1}$  | 41.39 | 6.39  |
|                                  | $F_{9-2}$  | 17.80 | 5.41  |
|                                  | $F_{9-3}$  | 9.79  | 5.41  |
| Xi'nanzhuang fault ( $F_{11}$ )  | $F_{11-1}$ | 20.03 | 20.56 |
|                                  | $F_{11-2}$ | 13.35 | 7.92  |
|                                  | $F_{11-3}$ | 13.35 | 12.78 |
| Haihe fault ( $F_{12}$ )         | $F_{12-1}$ | 18.25 | 10.70 |
|                                  | $F_{12-2}$ | 12.46 | 6.67  |
|                                  | $F_{12-3}$ | 11.13 | 10.70 |
|                                  | $F_{12-4}$ | 33.82 | 4.90  |
| Hangu fault ( $F_{13}$ )         | $F_{13-1}$ | 15.58 | 4.52  |
|                                  | $F_{13-2}$ | 10.68 | 19.54 |
|                                  | $F_{13-3}$ | 11.57 | 6.19  |
| Cangdong fault ( $F_{14}$ )      | $F_{14-1}$ | 25.81 | 16.89 |
|                                  | $F_{14-2}$ | 9.79  | 10.22 |
|                                  | $F_{14-3}$ | 21.81 | 8.47  |
| Lengkou fault ( $F_{17}$ )       | $F_{17-1}$ | 34.27 | 4.49  |

|            |       |       |
|------------|-------|-------|
| $F_{17-2}$ | 39.16 | 4.72  |
| $F_{17-3}$ | 20.03 | 4.54  |
| $F_{17-4}$ | 14.24 | 22.23 |

1  
2  
3  
4  
5

**Table S3.** Probability of fault slip potential on the mapped faults in Tangshan seismic region (beyond a range of 45 km away from the injection wells) in response to the fluid injection at five hypothetical wells in the MTY EGS field.

| Name of fault                  | Segment   | Probability of fault slip potential |         |         |         |
|--------------------------------|-----------|-------------------------------------|---------|---------|---------|
|                                |           | in 2020                             | in 2030 | in 2040 | in 2050 |
| Jiyunhe fault ( $F_2$ )        | $F_{2-1}$ | 39%                                 | 39%     | 39%     | 39%     |
|                                | $F_{2-2}$ | 19%                                 | 19%     | 19%     | 19%     |
|                                | $F_{2-3}$ | 27%                                 | 27%     | 27%     | 27%     |
| Yejituo fault ( $F_3$ )        | $F_{3-1}$ | 29%                                 | 29%     | 29%     | 29%     |
|                                | $F_{3-2}$ | 30%                                 | 30%     | 30%     | 30%     |
|                                | $F_{3-3}$ | 30%                                 | 30%     | 30%     | 30%     |
|                                | $F_{3-4}$ | 30%                                 | 30%     | 30%     | 30%     |
| Tangshan fault belt ( $F_4$ )  | $F_{4-1}$ | 38%                                 | 38%     | 38%     | 38%     |
|                                | $F_{4-2}$ | 30%                                 | 30%     | 30%     | 30%     |
|                                | $F_{4-3}$ | 40%                                 | 40%     | 40%     | 40%     |
|                                | $F_{4-4}$ | 14%                                 | 14%     | 14%     | 14%     |
|                                | $F_{4-5}$ | 35%                                 | 35%     | 35%     | 35%     |
|                                | $F_{4-6}$ | 40%                                 | 40%     | 40%     | 40%     |
| Changli-Ninghe fault ( $F_5$ ) | $F_{5-1}$ | 30%                                 | 30%     | 30%     | 30%     |
|                                | $F_{5-2}$ | 15%                                 | 15%     | 15%     | 15%     |
|                                | $F_{5-3}$ | 35%                                 | 35%     | 35%     | 35%     |
|                                | $F_{5-4}$ | 37%                                 | 37%     | 37%     | 38%     |

|                                  |            |     |     |     |     |
|----------------------------------|------------|-----|-----|-----|-----|
|                                  | $F_{5-5}$  | 18% | 18% | 18% | 19% |
|                                  | $F_{5-6}$  | 25% | 25% | 25% | 25% |
|                                  | $F_{5-7}$  | 31% | 31% | 31% | 31% |
|                                  | $F_{5-8}$  | 32% | 32% | 32% | 32% |
|                                  | $F_{5-9}$  | 28% | 28% | 28% | 28% |
| Lulong fault ( $F_6$ )           | $F_{6-1}$  | 3%  | 3%  | 3%  | 3%  |
|                                  | $F_{6-2}$  | 7%  | 7%  | 7%  | 7%  |
| Luanxian-Laoting fault ( $F_7$ ) | $F_{7-1}$  | 1%  | 1%  | 1%  | 1%  |
|                                  | $F_{7-2}$  | 4%  | 4%  | 4%  | 4%  |
|                                  | $F_{7-3}$  | 30% | 30% | 30% | 30% |
|                                  | $F_{7-4}$  | 26% | 26% | 26% | 27% |
|                                  | $F_{7-5}$  | 32% | 32% | 33% | 33% |
| Baigezhuang fault ( $F_8$ )      | $F_{8-1}$  | 11% | 11% | 11% | 11% |
|                                  | $F_{8-2}$  | 12% | 12% | 12% | 13% |
|                                  | $F_{8-3}$  | 23% | 24% | 25% | 26% |
|                                  | $F_{8-4}$  | 28% | 28% | 28% | 29% |
| Qinbei fault ( $F_9$ )           | $F_{9-1}$  | 30% | 30% | 30% | 30% |
|                                  | $F_{9-2}$  | 31% | 31% | 31% | 31% |
|                                  | $F_{9-3}$  | 31% | 31% | 31% | 31% |
| Xi'nanzhuang fault ( $F_{11}$ )  | $F_{11-1}$ | 6%  | 6%  | 6%  | 6%  |
|                                  | $F_{11-2}$ | 27% | 27% | 27% | 27% |
|                                  | $F_{11-3}$ | 20% | 20% | 20% | 20% |
| Haihe fault ( $F_{12}$ )         | $F_{12-1}$ | 21% | 21% | 21% | 21% |
|                                  | $F_{12-2}$ | 27% | 27% | 27% | 27% |
|                                  | $F_{12-3}$ | 21% | 21% | 21% | 21% |
|                                  | $F_{12-4}$ | 33% | 33% | 33% | 33% |

|                             |            |     |     |     |     |
|-----------------------------|------------|-----|-----|-----|-----|
| Hangu fault ( $F_{13}$ )    | $F_{13-1}$ | 34% | 34% | 34% | 34% |
|                             | $F_{13-2}$ | 10% | 10% | 10% | 10% |
|                             | $F_{13-3}$ | 30% | 30% | 30% | 30% |
| Cangdong fault ( $F_{14}$ ) | $F_{14-1}$ | 7%  | 7%  | 7%  | 7%  |
|                             | $F_{14-2}$ | 17% | 17% | 17% | 17% |
|                             | $F_{14-3}$ | 20% | 20% | 20% | 20% |
| Lengkou fault ( $F_{17}$ )  | $F_{17-1}$ | 33% | 33% | 33% | 33% |
|                             | $F_{17-2}$ | 32% | 32% | 32% | 32% |
|                             | $F_{17-3}$ | 36% | 36% | 36% | 36% |
|                             | $F_{17-4}$ | 7%  | 7%  | 7%  | 7%  |

1  
2  
3  
4

**Table S4.** Probability of fault slip potential on the boundary faults near the MTY EGS field (within a range of 15 km away from the injection wells) in response to the fluid injection at five hypothetical wells in the MTY EGS field.

| Tectonic unit      | Segment   | Length, km | Probability of fault slip potential |         |         |         |
|--------------------|-----------|------------|-------------------------------------|---------|---------|---------|
|                    |           |            | in 2020                             | in 2030 | in 2040 | in 2050 |
| Between II and I   | $F_{b1}$  | 3.85       | 2.0%                                | 2.2%    | 2.8%    | 3.6%    |
|                    | $F_{b2}$  | 3.21       | 0.1%                                | 0.2%    | 0.3%    | 0.3%    |
|                    | $F_{b3}$  | 5.64       | 0.1%                                | 0.1%    | 0.1%    | 0.1%    |
|                    | $F_{b4}$  | 1.28       | 8.1%                                | 14.4%   | 20.2%   | 25.0%   |
|                    | $F_{b5}$  | 4.36       | 14.6%                               | 20.7%   | 26.5%   | 30.5%   |
|                    | $F_{b6}$  | 7.56       | 16.1%                               | 17.3%   | 20.0%   | 21.7%   |
| Between II and III | $F_{b7}$  | 16.67      | 35.7%                               | 38.4%   | 43.9%   | 47.5%   |
| Between III and IV | $F_{b8}$  | 3.08       | 9.7%                                | 10.3%   | 11.2%   | 12.6%   |
|                    | $F_{b9}$  | 3.33       | 31.0%                               | 32.3%   | 35.0%   | 38.1%   |
|                    | $F_{b10}$ | 4.23       | 12.0%                               | 13.5%   | 15.8%   | 18.4%   |
| Between II and IV  | $F_{b11}$ | 6.15       | 38.5%                               | 49.2%   | 55.6%   | 59.5%   |



|                  |           |      |       |       |       |       |
|------------------|-----------|------|-------|-------|-------|-------|
|                  | $F_{b12}$ | 3.72 | 29.5% | 46.9% | 55.1% | 59.7% |
|                  | $F_{b13}$ | 8.21 | 11.1% | 27.7% | 31.5% | 35.1% |
|                  | $F_{b14}$ | 5.77 | 37.9% | 42.9% | 49.1% | 52.8% |
| Southwestern II  | $F_{b15}$ | 4.87 | 17.4% | 18.0% | 19.6% | 21.6% |
|                  | $F_{b16}$ | 3.85 | 8.0%  | 8.6%  | 9.3%  | 10.0% |
| Between IV and V | $F_{b17}$ | 2.69 | 17.0% | 17.9% | 19.1% | 21.1% |
|                  | $F_{b18}$ | 9.10 | 11.3% | 12.5% | 15.1% | 18.0% |
|                  | $F_{b19}$ | 3.85 | 37.6% | 40.4% | 43.4% | 46.2% |
|                  | $F_{b20}$ | 3.08 | 21.7% | 22.6% | 24.4% | 26.9% |

1  
2  
3

**Table S5.** The net monthly injection volume used for estimating the maximum magnitude of injection-related earthquakes in the MTY EGS field.

| Fluid injected rate, L/s | Monthly injection volume, m <sup>3</sup> | Fluid loss | The net injected volume, m <sup>3</sup> |
|--------------------------|------------------------------------------|------------|-----------------------------------------|
| 1                        | 2.59×10 <sup>3</sup>                     |            | 2.59×10 <sup>2</sup>                    |
| 10                       | 2.59×10 <sup>4</sup>                     |            | 2.59×10 <sup>3</sup>                    |
| 20                       | 5.18×10 <sup>4</sup>                     |            | 5.18×10 <sup>3</sup>                    |
| 30                       | 7.78×10 <sup>4</sup>                     |            | 7.78×10 <sup>3</sup>                    |
| 40                       | 1.04×10 <sup>5</sup>                     |            | 1.04×10 <sup>4</sup>                    |
| 50                       | 1.30×10 <sup>5</sup>                     |            | 1.30×10 <sup>4</sup>                    |
| 60                       | 1.56×10 <sup>5</sup>                     | 10%        | 1.56×10 <sup>4</sup>                    |
| 70                       | 1.81×10 <sup>5</sup>                     |            | 1.81×10 <sup>4</sup>                    |
| 80                       | 2.07×10 <sup>5</sup>                     |            | 2.07×10 <sup>4</sup>                    |
| 90                       | 2.33×10 <sup>5</sup>                     |            | 2.33×10 <sup>4</sup>                    |
| 100                      | 2.59×10 <sup>5</sup>                     |            | 2.59×10 <sup>4</sup>                    |
| 110                      | 2.85×10 <sup>5</sup>                     |            | 2.85×10 <sup>4</sup>                    |
| 120                      | 3.11×10 <sup>5</sup>                     |            | 3.11×10 <sup>4</sup>                    |

|     |                    |     |                     |
|-----|--------------------|-----|---------------------|
| 1   | $2.59 \times 10^3$ |     | $5.18 \times 10^2$  |
| 10  | $2.59 \times 10^4$ |     | $5.18 \times 10^3$  |
| 20  | $5.18 \times 10^4$ |     | $1.036 \times 10^4$ |
| 30  | $7.78 \times 10^4$ |     | $1.556 \times 10^4$ |
| 40  | $1.04 \times 10^5$ |     | $2.08 \times 10^4$  |
| 50  | $1.30 \times 10^5$ |     | $2.60 \times 10^4$  |
| 60  | $1.56 \times 10^5$ | 20% | $3.12 \times 10^4$  |
| 70  | $1.81 \times 10^5$ |     | $3.62 \times 10^4$  |
| 80  | $2.07 \times 10^5$ |     | $4.14 \times 10^4$  |
| 90  | $2.33 \times 10^5$ |     | $4.66 \times 10^4$  |
| 100 | $2.59 \times 10^5$ |     | $5.18 \times 10^4$  |
| 110 | $2.85 \times 10^5$ |     | $5.70 \times 10^4$  |
| 120 | $3.11 \times 10^5$ |     | $6.22 \times 10^4$  |
| 1   | $2.59 \times 10^3$ |     | $7.77 \times 10^2$  |
| 10  | $2.59 \times 10^4$ |     | $7.77 \times 10^3$  |
| 20  | $5.18 \times 10^4$ |     | $1.554 \times 10^4$ |
| 30  | $7.78 \times 10^4$ |     | $2.334 \times 10^4$ |
| 40  | $1.04 \times 10^5$ |     | $3.12 \times 10^4$  |
| 50  | $1.30 \times 10^5$ |     | $3.90 \times 10^4$  |
| 60  | $1.56 \times 10^5$ | 30% | $4.68 \times 10^4$  |
| 70  | $1.81 \times 10^5$ |     | $5.43 \times 10^4$  |
| 80  | $2.07 \times 10^5$ |     | $6.21 \times 10^4$  |
| 90  | $2.33 \times 10^5$ |     | $6.99 \times 10^4$  |
| 100 | $2.59 \times 10^5$ |     | $7.77 \times 10^4$  |
| 110 | $2.85 \times 10^5$ |     | $8.55 \times 10^4$  |
| 120 | $3.11 \times 10^5$ |     | $9.33 \times 10^4$  |

|     |                    |     |                     |
|-----|--------------------|-----|---------------------|
| 1   | $2.59 \times 10^3$ |     | $1.036 \times 10^3$ |
| 10  | $2.59 \times 10^4$ |     | $1.036 \times 10^4$ |
| 20  | $5.18 \times 10^4$ |     | $2.072 \times 10^4$ |
| 30  | $7.78 \times 10^4$ |     | $3.112 \times 10^4$ |
| 40  | $1.04 \times 10^5$ |     | $4.16 \times 10^4$  |
| 50  | $1.30 \times 10^5$ |     | $5.20 \times 10^4$  |
| 60  | $1.56 \times 10^5$ | 40% | $6.24 \times 10^4$  |
| 70  | $1.81 \times 10^5$ |     | $7.24 \times 10^4$  |
| 80  | $2.07 \times 10^5$ |     | $8.28 \times 10^4$  |
| 90  | $2.33 \times 10^5$ |     | $9.32 \times 10^4$  |
| 100 | $2.59 \times 10^5$ |     | $1.036 \times 10^5$ |
| 110 | $2.85 \times 10^5$ |     | $1.140 \times 10^5$ |
| 120 | $3.11 \times 10^5$ |     | $1.244 \times 10^5$ |

1  
2
